# Supplementary material for: A comparative theoretical study on the optoelectronic and nonlinear optical properties of [Pt(bpy)(qdt)] derivatives with electron-donating and -withdrawing anchors
Source: Royal Society of Chemistry journal article supplement (doi:10.1039/c9nj02463h), 2019-01-01
Supplement: c9nj02463h1.pdf [file c9nj02463h1.pdf]

## *Supporting Information*

# **A comparative theoretical study on the optoelectronic and nonlinear optical properties of Pt(bpy)(qdt) derivatives with electron-donating and -withdrawing anchors**

Sepideh Samiee\*, Parisa Hossienpour

*Department of Chemistry, Faculty of Science, Shahid Chamran University of Ahvaz, Ahvaz, Iran*

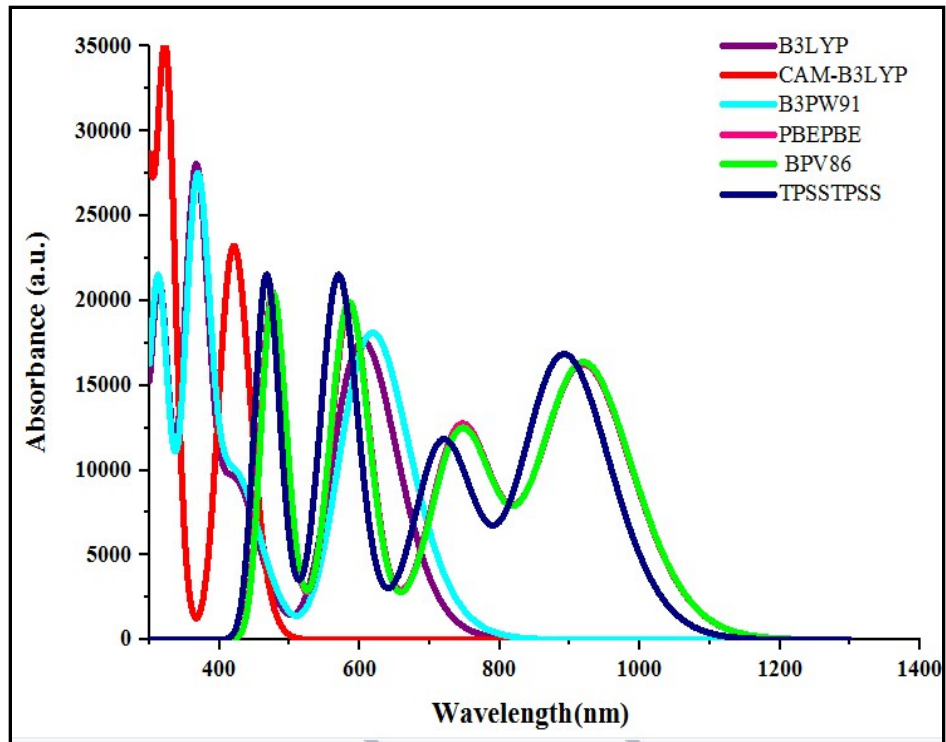

**Figure S1.** Absorption spectra of **2b** complex in acetonitrile solution under different exchange-correlation functional with 6-31G (d)/LanL2DZ basis set.

|                     | R=H                                                                                 | 1a                                                                                   | 2a                                                                                    |
|---------------------|-------------------------------------------------------------------------------------|--------------------------------------------------------------------------------------|---------------------------------------------------------------------------------------|
| Optimized Structure | 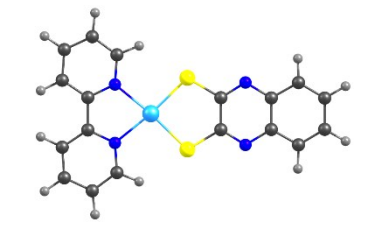   |    |    |
| HOMO                |    |    |    |
| LUMO                |    |    |    |
|                     | 3a                                                                                  | 4a                                                                                   | 1b                                                                                    |
| Optimized Structure |  |  |  |
| HOMO                |  |  |  |
| LUMO                |  |  |  |

**Figure S2.** The optimized geometries and calculated isodensity of frontier occupied molecular orbitals for all complexes.

|                     | 2b                                                                                 | 3b                                                                                  | 4b                                                                                   |
|---------------------|------------------------------------------------------------------------------------|-------------------------------------------------------------------------------------|--------------------------------------------------------------------------------------|
| Optimized Structure | 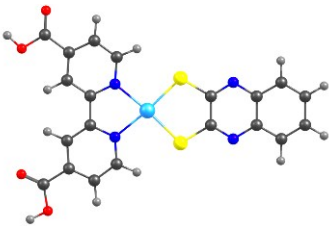  |   |   |
| HOMO                |   |   |   |
| LUMO                |  |  |  |

Figure S2. Continued

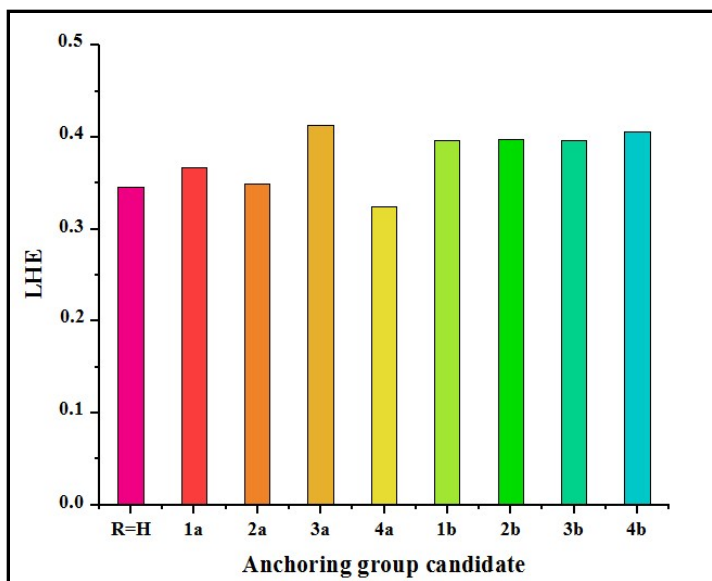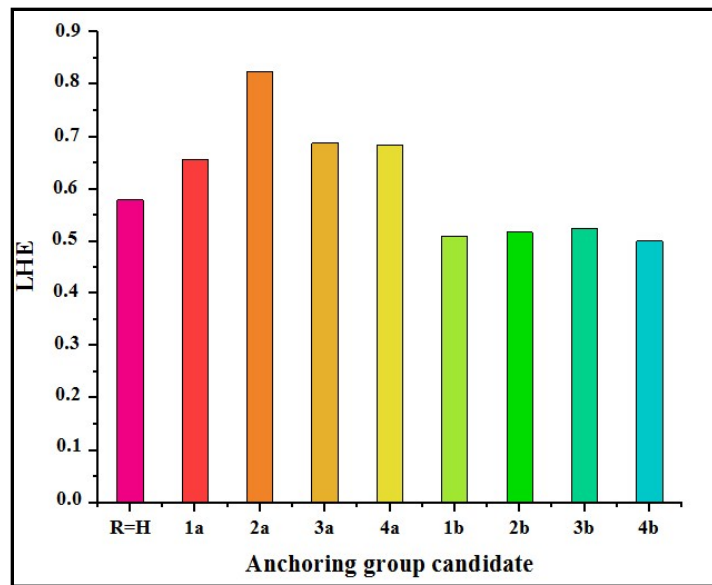

**Figure S3.** Comparison of the calculated LHE values for [Pt(bpy)(qdt)] derivatives vacuum in (left) and in solvent (right).

**Table S1.** The optimized main geometry parameters for all considered structures in ground state

|                       | <b>R=H</b> | <b>1a</b> | <b>2a</b> | <b>3a</b> | <b>4a</b> | <b>1b</b> | <b>2b</b> | <b>3b</b> | <b>4b</b> |
|-----------------------|------------|-----------|-----------|-----------|-----------|-----------|-----------|-----------|-----------|
| <b>Bond length(Å)</b> |            |           |           |           |           |           |           |           |           |
| Pt–N                  | 2.097      | 2.097     | 2.101     | 2.096     | 2.102     | 2.088     | 2.089     | 2.092     | 2.092     |
| Pt–S                  | 2.319      | 2.320     | 2.322     | 2.318     | 2.319     | 2.306     | 2.306     | 2.307     | 2.304     |
| C–C <sup>qdt</sup>    | 1.446      | 1.447     | 1.449     | 1.446     | 1.447     | 1.444     | 1.444     | 1.445     | 1.443     |
| C–C <sup>bpy</sup>    | 1.471      | 1.473     | 1.479     | 1.476     | 1.475     | 1.469     | 1.469     | 1.469     | 1.467     |
| C–N                   | 1.362      | 1.363     | 1.361     | 1.360     | 1.362     | 1.366     | 1.364     | 1.363     | 1.364     |
| C–N                   | 1.311      | 1.311     | 1.312     | 1.311     | 1.311     | 1.312     | 1.312     | 1.311     | 1.311     |
| C–S                   | 1.764      | 1.764     | 1.764     | 1.765     | 1.765     | 1.764     | 1.764     | 1.764     | 1.765     |
| <b>Bond angle(°)</b>  |            |           |           |           |           |           |           |           |           |
| N–Pt–N                | 78.17      | 78.02     | 80.52     | 88.70     | 78.02     | 78.59     | 78.50     | 78.38     | 78.40     |
| S–Pt–S                | 88.71      | 88.73     | 91.10     | 90.24     | 88.73     | 88.72     | 88.73     | 88.73     | 88.78     |
| S–Pt–N(cis)           | 96.55      | 96.61     | 94.18     | 94.51     | 96.63     | 96.26     | 96.39     | 96.44     | 96.428    |
| S–Pt–N(cis)           | 96.55      | 96.63     | 94.18     | 94.51     | 96.61     | 96.40     | 96.36     | 96.42     | 96.383    |
| N–Pt–S(trans)         | 174.73     | 174.65    | 174.71    | 175.07    | 174.63    | 175.00    | 174.86    | 174.81    | 174.79    |
| N–Pt–S(trans)         | 174.73     | 174.63    | 174.71    | 175.07    | 174.65    | 174.86    | 174.89    | 174.82    | 174.83    |

**Table S2.** The calculated frontier orbital energies and HOMO–LUMO gap energies (eV) all considered structures.

|        | R=H   | 1a    | 2a    | 3a    | 4a    | 1b    | 2b    | 3b    | 4b    |
|--------|-------|-------|-------|-------|-------|-------|-------|-------|-------|
| LUMO+5 | -0.36 | -0.26 | 0.18  | -0.78 | -0.22 | -1.09 | -0.84 | -0.67 | -1.16 |
| LUMO+4 | -0.94 | -0.85 | -0.59 | -1.00 | -0.84 | -1.28 | -1.16 | -1.09 | -1.37 |
| LUMO+3 | -1.05 | -0.92 | -0.60 | -1.11 | -0.92 | -1.45 | -1.30 | -1.24 | -1.61 |
| LUMO+2 | -1.70 | -1.52 | -0.90 | -1.92 | -1.36 | -2.59 | -2.37 | -2.20 | -2.68 |
| LUMO+1 | -1.88 | -1.75 | -1.20 | -2.09 | -1.66 | -3.15 | -2.73 | -2.29 | -2.77 |
| LUMO   | -2.84 | -2.68 | -2.25 | -2.99 | -2.65 | -3.62 | -3.36 | -3.18 | -3.66 |
| HOMO   | -4.94 | -4.82 | -4.49 | -4.97 | -4.78 | -5.33 | -5.19 | -5.12 | -5.45 |
| HOMO-1 | -5.13 | -5.02 | -4.72 | -5.18 | -4.99 | -5.52 | -5.38 | -5.31 | -5.62 |
| HOMO-2 | -5.83 | -5.73 | -5.46 | -5.88 | -5.71 | -6.19 | -6.06 | -5.99 | -6.29 |
| HOMO-3 | -6.17 | -6.08 | -5.81 | -6.21 | -6.05 | -6.52 | -6.39 | -6.32 | -6.61 |
| HOMO-4 | -6.46 | -6.32 | -5.90 | -6.50 | -6.25 | -6.97 | -6.80 | -6.71 | -7.10 |
| HOMO-5 | -6.66 | -6.54 | -6.16 | -6.65 | -6.48 | -7.04 | -6.90 | -6.84 | -7.15 |
